# Supplementary material for: Minimal Change Disease: More Than a Podocytopathy?
Source: PubMed Central journal article supplement — Kidney Int Rep. 2022 Mar 3;7(4):675–7. doi: 10.1016/j.ekir.2022.03.001 (PMC9039900; doi:10.1016/j.ekir.2022.03.001), 2022-03-03
Supplement: mmc1.pdf [file mmc1.pdf]

- S1 Haraldsson B, Nystrom J. The glomerular endothelium: new insights on function and structure. *Curr Opin Nephrol Hypertens* 2012; **21**: 258-263.
- S2 Garsen M, Rops AL, Rabelink TJ, et al. The role of heparanase and the endothelial glycocalyx in the development of proteinuria. *Nephrol Dial Transplant* 2014; 29: 49-55.
- S3 Singh A, Satchell SC, Neal CR, et al. Glomerular endothelial glycocalyx constitutes a barrier to protein permeability. *J Am Soc Nephrol* 2007; 18: 2885-2893.
- S4 Rabelink TJ, van den Berg BM, Garsen M, et al. Heparanase: roles in cell survival, extracellular matrix remodelling and the development of kidney disease. *Nat Rev Nephrol* 2017; 13: 201-212.
- S5 Holt RC, Webb NJ, Ralph S, et al. Heparanase activity is dysregulated in children with steroid-sensitive nephrotic syndrome. *Kidney Int* 2005; 67: 122-129.
- S6 Van den Berg JG. Immune-mediated podocyte injury and the idiopathic nephrotic syndrome [thesis]. <https://hdl.handle.net/11245/1.222092>. Amsterdam, 2004.
- S7 Lennon R, Singh A, Welsh GI, et al. Hemopexin induces nephrin-dependent reorganization of the actin cytoskeleton in podocytes. *J Am Soc Nephrol* 2008; 19: 2140-2149.
- S8 Eremina V, Jefferson JA, Kowalewska J, et al. VEGF inhibition and renal thrombotic microangiopathy. *N Engl J Med* 2008; 358: 1129-1136.
- S9 Nakagawa T, Sato W, Sautin YY, et al. Uncoupling of vascular endothelial growth factor with nitric oxide as a mechanism for diabetic vasculopathy. *J Am Soc Nephrol* 2006; 17: 736-745.
- S10 Garsen M, Rops AL, Li J, et al. Endothelial Nitric Oxide Synthase Prevents Heparanase Induction and the Development of Proteinuria. *PLoS One* 2016; 11: e0160894.

- S11 Savard S, Lavoie P, Villeneuve C, et al. eNOS gene delivery prevents hypertension and reduces renal failure and injury in rats with reduced renal mass. *Nephrol Dial Transplant* 2012; 27: 2182-2190.
- S12 Collino F, Bussolati B, Gerbaudo E, et al. Preeclamptic sera induce nephrin shedding from podocytes through endothelin-1 release by endothelial glomerular cells. *Am J Physiol Renal Physiol* 2008; 294: F1185-1194.
- S13 Garsen M, Lenoir O, Rops AL, *et al.* Endothelin-1 Induces Proteinuria by Heparanase-Mediated Disruption of the Glomerular Glycocalyx. *J Am Soc Nephrol* 2016; **27**: 3545-3551.
- S14 Boner G, Cox AJ, Kelly DJ, et al. Does vascular endothelial growth factor (VEGF) play a role in the pathogenesis of minimal change disease? *Nephrol Dial Transplant* 2003; 18: 2293-2299.
- S15 Moriyama T, Tsuruta Y, Shimizu A, et al. The significance of caveolae in the glomeruli in glomerular disease. *J Clin Pathol* 2011; 64: 504-509.
